# Supplementary material for: Contrasting determinants for the introduction and establishment success of exotic birds in Taiwan using decision trees models
Source: PeerJ. 2017 Mar 14;5:e3092. doi: 10.7717/peerj.3092 (PMC5354111; doi:10.7717/peerj.3092)
Supplement: Supplemental Information 1 — Table S1. Species list and associated variable information. Table S2. Code description of variable. [file peerj-05-3092-s001.xlsx]

## Sheet: Table S1-species list
Genus	Species	code	order	Family	escape	success	Feed	Hole	Overlap	Diet	Habitat	Migration	Nesting	Dicromatism	subspecies	Length	Mass	Clutch	Incubation	Range	Mlength	Mmass	Mclutch	Minincub	Invcountry_Max	Taiwangenus_resident
Cacatua	alba	caal	Psittaciformes	Cacatuidae	1	1	2	1	0	5	1	0	2	0	0	46	550	2.5	27.5	20400	46	550	3	27	1	0
Cacatua	galerita	cagal	Psittaciformes	Cacatuidae	1	1	1	1	0	3	5	0	2	0	4	50	895	2.5	26	3910000	55	975	3	25	3	0
Cacatua	goffini	cago	Psittaciformes	Cacatuidae	1	1	1	0	0	2	5	0	2	0	0	29	300	3	23.5	4100	32	300	4	21	2	0
Cacatua	moluccensis	camo	Psittaciformes	Cacatuidae	1	1	1	1	0	3	1	0	2	0	0	50	850	2	28.5	18200	50	850	3	28	1	0
Geopelia	striata	gest	Columbiformes	Columbidae	1	1	2	0	0	5	6	1	1	0	0	21	56.6	2	13	1480000	21	62.1	2	13	11	0
Cyanopica	cyanus	cycy	Passeriformes	Corvidae	1	1	2	1	0	6	6	0	2	0	7	37	99	6.5	15.5	5100000	38	118	8	15	1	0
Urocissa	erythroryncha	urer	Passeriformes	Corvidae	1	1	2	0	2	6	5	0	2	0	5	58.5	130.5	4.5	.	4460000	64	192	6	.	1	1
Eudynamys	scolopacea	eusc	Cuculiformes	Cuculidae	1	1	2	0	2	5	6	2	2	1	17	42.5	234	1	13.5	9730000	46	327	1	13	0	0
Paroaria	coronata	paco	Passeriformes	Emberizidae	1	1	2	0	0	5	6	0	2	0	0	19	36.75	3	12	2390000	19	44	5	11	4	0
Estrilda	astrild	esas	Passeriformes	Estrildidae	1	1	2	1	0	5	6	1	3	1	16	11.25	8.5	5	12	5860000	13	11	6	12	17	0
Estrilda	melpoda	esme	Passeriformes	Estrildidae	1	1	2	0	0	5	5	1	0	0	0	10	8.05	5	11	3730000	10	9.6	6	11	7	0
Euodice (Lonchura)	malabarica	eumal	Passeriformes	Estrildidae	1	1	2	1	2	5	6	1	2	0	0	11	12	5.5	13	3310000	11	14	8	12	8	1
Lonchura	maja	lomaj	Passeriformes	Estrildidae	1	1	1	0	0	2	5	0	1	0	0	11	12.5	5	12.5	768000	11	14	7	12	2	1
Lonchura	malacca (atricapilla)	lomal	Passeriformes	Estrildidae	1	1	1	0	1	2	5	1	2	0	0	11.5	12.1	4.5	12.5	4690000	12	14.4	5	12	3	1
Lonchura (Padda)	oryzivora	loor	Passeriformes	Estrildidae	1	1	2	1	0	5	6	0	2	0	0	15	25.15	5.5	13.5	99600	15	27.8	7	13	9	1
Serinus	mozambicus	semo	Passeriformes	Fringillidae	1	1	2	0	0	5	5	0	2	1	10	12	12.35	3	13.5	9530000	13	16.2	4	13	5	0
Ploceus	aurantius	plau	Passeriformes	Ploceidae	1	1	2	0	0	5	4	0	2	1	2	14	25	2	13.5	440000	14	29	2	13	0	0
Ploceus	cucullatus	plcu	Passeriformes	Ploceidae	1	1	2	0	0	5	6	0	2	1	5	17	32	3	12	13700000	17	47	4	12	7	0
Eos	bornea	eobo	Psittaciformes	Psittacidae	1	1	2	1	0	5	4	0	2	0	2	31	156	.	.	57900	31	179	.	.	1	0
Trichoglossus	haematodus	trha	Psittaciformes	Psittacidae	1	1	1	1	0	4	5	1	2	0	20	27.5	116	2	25	875000	30	157	3	25	2	0
Pycnonotus	jocosus	pyjo	Passeriformes	Pycnonotidae	1	1	2	0	2	5	6	0	1	0	9	19.25	28	3	13	5180000	20.5	31	4	12	8	1
Acridotheres (Sturnus)	burmannicus	acbu	Passeriformes	Sturnidae	1	1	2	1	2	5	5	1	3	0	2	22	.	.	.	883000	22	.	.	.	1	1
Acridotheres	fuscus	acfu	Passeriformes	Sturnidae	1	1	2	1	2	5	5	2	3	0	4	24	85	4.5	.	2410000	24	98	6	.	4	1
Acridotheres	javanicus	acja	Passeriformes	Sturnidae	1	1	2	1	0	5	6	1	3	0	0	21	100	3.5	13.5	.	21	100	5	13	2	1
Acridotheres	tristis	actr	Passeriformes	Sturnidae	1	1	2	1	2	6	6	1	3	0	2	25	128	4.5	15.5	7190000	25	143	5	13	37	1
Aplonis	panayensis	appa	Passeriformes	Sturnidae	1	1	2	1	2	5	6	1	3	0	14	20	55.25	3	.	2150000	20	60.5	3	.	0	0
Gracupica	nigricollis	grni	Passeriformes	Sturnidae	1	1	2	0	2	5	5	0	2	0	0	28	150	4	.	2860000	28	178	5	.	2	0
Gracula	religiosa	grre	Passeriformes	Sturnidae	1	1	2	1	2	6	5	1	2	0	7	30	195	2.5	15	3990000	30	229	3	13	3	0
Sturnia (Sturnus)	malabarica (malabaricus)	stma	Passeriformes	Sturnidae	1	1	2	1	2	5	6	1	2	0	3	20	38	4	.	3370000	20	44	5	.	0	0
Threskiornis	aethiopicus	thae	Ciconiiformes	Threskiornithidae	1	1	2	0	0	6	6	3	2	0	3	77	1500	2.5	28.5	17600000	124	1500	5	28	3	0
Dryonastes (Garrulax)	chinensis	drch	Passeriformes	Timaliidae	1	1	2	0	2	5	3	0	2	0	5	26.5	88.5	4	13	1410000	30	113	5	13	0	1
Leucodioptron (Garrulax)	canorum (canorus)	leca	Passeriformes	Timaliidae	1	1	2	0	2	5	6	0	2	0	2	22.5	62	3.5	12	1840000	24	75	5	12	0	1
Pterorhinus (Garrulax)	sannio	ptsa	Passeriformes	Timaliidae	1	1	2	0	2	5	5	0	3	0	4	23	67.5	3.5	15.5	2030000	24	83	4	14	0	1
Copsychus	malabaricus	coma	Passeriformes	Turdidae	1	1	3	1	2	5	5	0	2	1	12	24.5	36.5	3	13.6	4230000	28	42	5	13.6	3	0
Copsychus	saularis	cosa	Passeriformes	Turdidae	1	1	2	0	2	6	6	0	3	1	8	20	35	3.5	12.5	9300000	21	41	5	12	2	0
Vidua	macroura	vima	Passeriformes	Viduidae	1	1	2	0	0	5	5	0	2	1	0	11.5	15.5	3.5	11	13200000	32	18.8	4	11	3	0
Aix	sponsa	aisp	Anseriformes	Anatidae	1	0	1	1	2	2	4	2	2	1	0	47	680.5	12	30	4480000	51	879	15	30	0	1
Bombycilla	garrulus	boga	Passeriformes	Bombycillidae	1	0	2	0	0	5	5	2	2	0	3	21	59.5	5	14.5	12800000	23	85	7	14	0	0
Bombycilla	japonica	boja	Passeriformes	Bombycillidae	1	0	2	0	0	5	5	1	2	0	0	16.5	59	5	15.5	869000	18	64	6	15	0	0
Cacatua	leadbeateri	cale	Psittaciformes	Cacatuidae	1	0	1	1	0	3	2	1	2	0	0	35	420	3.5	23.5	2880000	35	480	5	23	0	0
Cacatua	sulphurea	casu	Psittaciformes	Cacatuidae	1	0	1	1	0	3	5	0	2	0	4	33	350	2.5	27	255000	33	350	3	27	1	0
Nymphicus	hollandicus	nyho	Psittaciformes	Cacatuidae	1	0	2	1	0	2	5	3	2	1	0	33	90	5	20	6460000	33	100	7	20	1	0
Chloropsis	cochinchinensis	chco	Passeriformes	Chloropseidae	1	0	1	0	2	4	1	0	2	1	7	16.75	22	2	13.5	2620000	17.7	28.5	3	13.5	0	0
Chloropsis	hardwickii	chha	Passeriformes	Chloropseidae	1	0	2	0	2	5	1	1	2	1	4	18.4	33.5	2.5	13	1580000	19.8	33.5	3	13	0	0
Dicrurus	hottentottus	diho	Passeriformes	Dicruridae	1	0	2	0	2	5	1	3	2	0	14	28	83	3.5	.	7540000	32	102	5	.	0	1
Amandava	amandava	amaman	Passeriformes	Estrildidae	1	0	2	0	2	5	6	0	1	1	3	9.5	8.35	5	12	3580000	9.5	9.5	6	11	18	0
Amandava	subflava	amsu	Passeriformes	Estrildidae	1	0	2	0	0	5	5	0	0	1	2	9	8.05	5	13.5	3240000	9	10.9	6	13	0	0
Estrilda	troglodytes	estr	Passeriformes	Estrildidae	1	0	2	0	0	5	5	0	1	1	0	10	7.55	4.5	11.5	1960000	10	8.2	5	11	5	0
Taeniopygia	guttata	tagu	Passeriformes	Estrildidae	1	0	1	0	0	2	5	0	2	1	0	10	10	.	.	6360000	10	15.7	.	.	2	0
Coccothraustes	coccothraustes	cococc	Passeriformes	Fringillidae	1	0	2	0	2	5	5	3	2	0	6	17	59	4	12	3940000	18	72	5	11	0	0
Eophona	migratoria	eomi	Passeriformes	Fringillidae	1	0	2	0	2	5	6	3	2	1	2	16.5	48.5	4	.	1240000	18	57	5	.	0	0
Eophona (Coccothraustes)	personata	eope	Passeriformes	Fringillidae	1	0	2	0	2	5	5	3	2	0	2	20.5	82	3.5	.	830000	23	99	4	.	0	0
Serinus	atrogularis	seat	Passeriformes	Fringillidae	1	0	2	0	0	5	5	0	2	0	6	11.25	11	3	12.5	3010000	12	14	4	12	0	0
Serinus	capistratus	seca	Passeriformes	Fringillidae	1	0	1	0	0	2	4	0	2	1	2	11.5	.	.	.	657000	12	.	.	.	0	0
Serinus	canaria	secan	Passeriformes	Fringillidae	1	0	2	0	0	5	5	0	2	1	0	13	17.5	3.5	13.5	10500	13.5	20	4	13	1	0
Parus	spilonotus	pasp	Passeriformes	Paridae	1	0	2	1	2	5	5	1	2	1	4	14.75	20.5	5	.	1250000	15.5	23	6	.	0	1
Alectoris	chukar	alch	Galliformes	Phasianidae	1	0	2	0	0	5	5	1	1	0	14	35.5	565	9.5	23.5	10300000	39	800	12	22	13	0
Chrysolophus	amherstiae	cham	Galliformes	Phasianidae	1	0	2	0	1	5	2	0	0	1	0	67	714	6.5	24	384000	173	850	7	24	0	0
Phoenicopterus	ruber	phru	Phoenicopteriformes	Phoenicopteridae	1	0	2	0	2	6	4	2	0	0	2	132.5	3100	1	29	5310000	165	4100	2	27	1	0
Euplectes	afer	euaf	Passeriformes	Ploceidae	1	0	2	0	0	6	4	1	1	1	3	10	15.5	3	13	3090000	10	20	4	12	4	0
Euplectes	hordeaceus	euho	Passeriformes	Ploceidae	1	0	2	0	0	5	5	0	2	1	0	12	25.5	3	13	5100000	12	29	4	12	0	0
Euplectes	macroura (macrourus)	eumac	Passeriformes	Ploceidae	1	0	2	0	0	5	5	0	0	1	3	14	18.5	2.5	13	3990000	14	29	3	12	0	0
Euplectes	orix	euor	Passeriformes	Ploceidae	1	0	2	0	0	5	5	0	2	1	0	13	21.5	3	12.5	2970000	13	30	3	12	1	0
Euplectes	progne	eupr	Passeriformes	Ploceidae	1	0	2	0	0	5	3	1	0	1	3	15	32	2.5	13	698000	71.21	46	3	12	0	0
Agapornis	fischeri	agfi	Psittacifromes	Psittacidae	1	0	1	1	0	3	5	0	2	0	0	15	50	5.5	23	136000	15	58	8	23	4	0
Agapornis	personatus	agpe	Psittaciformes	Psittacidae	1	0	1	1	0	2	2	0	2	0	0	14	45	5.5	23	204000	15	47	8	23	2	0
Agapornis	roseicollis	agro	Psittaciformes	Psittacidae	1	0	1	0	0	2	2	0	3	0	2	16.5	53	5	23	469000	18	63	6	23	1	0
Eclectus	roratus	ecro	Psittaciformes	Psittacidae	1	0	1	1	0	3	5	1	2	1	9	38.5	485	2	26	1690000	42	615	2	26	2	0
Eos	semilarvata	eose	Psittaciformes	Psittacidae	1	0	1	1	0	4	1	3	2	0	0	24	105	.	.	410	24	105	.	.	0	0
Lorius	garrulus	loga	Psittaciformes	Psittacidae	1	0	1	1	0	4	5	.	2	0	3	30	215	2	.	25000	30	250	2	.	0	0
Melopsittacus	undulatus	meun	Psittaciformes	Psittacidae	1	0	1	1	0	2	5	2	2	1	0	18	27.5	5	18	5880000	18	29	8	18	2	0
Platycercus	elegans	plel	Psittaciformes	Psittacidae	1	0	1	1	0	2	1	2	2	0	3	36	140.5	5.5	19	842000	36	169	8	19	1	0
Psittacula	krameri	pskr	Psittaciformes	Psittacidae	1	0	1	1	2	3	1	1	2	0	4	40	119	3.5	22	7910000	43	143	6	22	33	0
Hemixos	castanonotus	heca	Passeriformes	Pycnonotidae	1	0	2	0	2	5	1	0	2	0	2	21.5	.	3	.	980000	21.5	.	3	.	0	0
Pycnonotus	aurigaster	pyau	Passeriformes	Pycnonotidae	1	0	2	0	2	6	6	0	2	0	9	20	45	3	.	2960000	21	50	6	.	2	1
Pycnonotus	xanthorrhous	pyxa	Passeriformes	Pycnonotidae	1	0	2	0	2	5	5	2	1	0	2	20	27.5	3	.	1740000	20	31	4	.	0	1
Acridotheres	albocinctus	acal	Passeriformes	Sturnidae	1	0	2	1	1	6	6	1	3	0	0	25	.	4	.	98900	25	.	4	.	0	1
Acridotheres	cristatellus	accr	Passeriformes	Sturnidae	1	0	2	1	2	6	6	0	3	0	3	25	124	5.5	14	3070000	25	140	7	14	6	1
Acridotheres	ginginianus	acgi	Passeriformes	Sturnidae	1	0	2	0	2	6	6	2	0	0	0	22	70	4.5	13	1530000	22	76	6	13	3	1
Acridotheres	grandis	acgr	Passeriformes	Sturnidae	1	0	2	1	1	5	5	0	3	0	0	25	99	5	.	1630000	25	103	6	.	1	1
Acridotheres (Sturnus)	melanopterus	acme	Passeriformes	Sturnidae	1	0	2	1	0	5	5	1	2	0	3	23	.	3.5	.	142000	23	.	4	.	1	1
Gracupica	contra	grco	Passeriformes	Sturnidae	1	0	2	0	2	6	6	1	3	0	5	22	83	5	14.5	3900000	22	90	6	14	3	0
Lamprotornis	regius	lare	Passeriformes	Sturnidae	1	0	2	1	0	5	2	1	2	0	0	30	54.5	3.5	14	1240000	30	63	4	14	0	0
Lamprotornis	superbus	lasu	Passeriformes	Sturnidae	1	0	2	1	0	5	6	0	3	0	0	18	64.5	4	13	2090000	18	77	4	12	0	0
Poliopsar (Sturnus)	cineraceus	pocine	Passeriformes	Sturnidae	1	0	2	1	2	6	6	3	3	1	0	22	81.5	5	12.5	1730000	22	95	10	12	0	0
Poliopsar (Sturnus)	sericeus	poser	Passeriformes	Sturnidae	1	0	2	1	2	5	5	2	3	1	0	22	65	.	.	1710000	22	65	.	.	0	0
Sturnus	vulgaris	stvu	Passeriformes	Sturnidae	1	0	2	1	2	6	6	3	3	1	13	21	80	.	12.5	17200000	21	100	.	11	20	0
Garrulax	leucolophus	gale	Passeriformes	Timaliidae	1	0	2	0	2	6	5	0	2	0	4	28.5	119.5	4	14	1720000	31	131	6	14	1	1
Garrulax	monileger	gamo	Passeriformes	Timaliidae	1	0	2	0	2	5	3	0	2	0	10	27.75	95.5	4	.	2500000	31.5	135	5	.	0	1
Garrulax	pectoralis	gape	Passeriformes	Timaliidae	1	0	2	0	2	5	5	0	2	0	5	30.5	137.5	5	.	2170000	34.5	170	7	.	1	1
Leiothrix	lutea	lelu	Passeriformes	Timaliidae	1	0	2	0	2	5	5	0	1	0	5	14.5	23	4	12.75	985000	15	28	5	11.5	5	0
Mesia	argentauris	mear	Passeriformes	Timaliidae	1	0	2	0	2	5	5	0	1	1	7	16.25	25.5	3.5	13.5	1130000	17	29	5	13	0	0
Luscinia (Erithacus)	akahige	luak	Passeriformes	Turdidae	1	0	3	1	2	5	5	3	2	1	2	14.5	.	4	13	237000	15	.	5	12	0	0
Tarsiger	cyanurus	tacy	Passeriformes	Turdidae	1	0	2	1	2	5	2	3	2	1	2	14	14	5	15	3080000	15	18	7	15	0	1
Vidua	paradisaea	vipa	Passeriformes	Viduidae	1	0	1	0	0	2	5	0	2	1	0	13.5	21	3.5	11	7160000	39	24	4	11	0	0
Alauda	arvensis	alar	Passeriformes	Alaudidae	0	0	2	0	2	5	5	1	0	0	13	17.5	33	4	11.5	33000000	19	50	7	10	3	1
Melanocorypha	mongolica	memo	Passeriformes	Alaudidae	0	0	2	0	0	5	3	1	0	0	0	19	54.9	4	15	3370000	19	65	5	15	0	0
Anthracoceros	malayanus	anma	Coraciformes	Bucerotidae	0	0	2	1	0	6	1	0	2	1	0	62.5	1050	2.5	30	799000	65	1050	3	30	0	0
Cacatua	ducorpsii	cadu	Psittaciformes	Cacatuidae	0	0	2	1	0	5	1	0	2	0	0	30	360	3	27	33000	30	360	3	27	0	0
Cacatua	ophthalmica	caop	Psittaciformes	Cacatuidae	0	0	1	0	0	3	1	0	2	0	0	50	535	2	29	19700	50	570	2	28	0	0
Cacatua	sanguinea	casa	Psittaciformes	Cacatuidae	0	0	2	1	0	5	3	3	2	0	5	37.5	505	2.5	25	5300000	39	580	3	24	0	0
Eolophus	roseicapillus	eoro	Psittaciformes	Cacatuidae	0	0	1	1	0	2	3	1	2	0	3	35.5	311	4	24	14400000	36	345	6	22	0	0
Lybius (Pogonornis)	dubius	lydu	Piciformes	Capitonidae	0	0	2	0	0	5	5	0	2	1	0	25.5	94	2	16	2330000	25.5	108	2	16	0	0
Psilopogon	pyrolophus	pspy	Piciformes	Capitonidae	0	0	2	0	0	6	1	0	2	1	0	29	128	2	.	475000	29	149	2	.	0	0
Trachyphonus	erythrocephalus	trer	Piciformes	Capitonidae	0	0	2	0	0	6	4	0	2	1	3	21.5	57.5	4	.	1570000	23	75	6	.	0	0
Chloropsis	aurifrons	chau	Passeriformes	Chloropseidae	0	0	2	0	2	5	5	0	2	0	6	18	32	2	14	3470000	19	37	3	14	1	0
Chloropsis	cyanopogon	chcy	Passeriformes	Chloropseidae	0	0	2	0	0	5	1	0	2	1	2	15.6	19.5	.	.	1210000	16.2	22.8	.	.	0	0
Chloropsis	sonnerati	chso	Passeriformes	Chloropseidae	0	0	2	0	0	5	5	0	2	1	2	19.5	39.6	.	.	1390000	21	48.2	.	.	0	0
Geopelia	cuneata	gecu	Columbiformes	Columbidae	0	0	2	0	0	5	3	3	1	0	0	21.5	35.5	2	13	5700000	24	43	2	13	1	0
Oena	capensis	oeca	Columbiformes	Columbidae	0	0	2	0	2	5	5	1	2	0	2	28	41	2	14.5	9880000	28	54	3	13	0	0
Streptopelia	decaocto	stde	Columbiformes	Columbidae	0	0	2	0	2	5	6	0	3	0	2	31	196	2	15	17900000	32	196	2	14	17	1
Cissa	chinensis	cich	Passeriformes	Corvidae	0	0	2	0	2	6	1	0	2	0	5	38	126.5	5	.	2110000	39	133	7	.	0	0
Emberiza	cioides	emci	Passeriformes	Emberizidae	0	0	2	0	1	5	5	1	1	1	5	17	21.5	4	11	10500000	17	26	6	11	0	0
Emberiza	elegans	emel	Passeriformes	Emberizidae	0	0	2	0	2	5	3	3	2	1	2	15.5	18	5	13	1980000	16	22	6	12	0	0
Emberiza	hortulana	emho	Passeriformes	Emberizidae	0	0	2	0	0	5	5	3	0	1	0	16.5	22.5	4.5	11.5	627000	17	28	5	11	0	0
Emberiza	rutila	emru	Passeriformes	Emberizidae	0	0	2	0	2	5	5	3	2	1	0	14.5	18	4	.	1030000	15	24	4	.	0	0
Plectrophenax	nivalis	plni	Passeriformes	Emberizidae	0	0	2	0	0	5	0	3	3	1	3	16	37	5	12.5	6830000	18	56	8	10	0	0
Amadina	fasciata	amfa	Passeriformes	Estrildidae	0	0	2	1	0	5	5	0	2	1	4	11.5	23.5	5	12.5	3350000	12	32	9	12	1	0
Erythrura (Chloebia)	gouldiae	ergo	Passeriformes	Estrildidae	0	0	2	1	0	5	1	1	2	1	0	15	13.25	6	14.5	101000	15	16	8	14	0	0
Erythrura	prasina	erpr	Passeriformes	Estrildidae	0	0	1	0	0	2	5	0	2	1	2	11.75	14.7	5	13	1590000	15	14.7	6	12	0	0
Estrilda	erythronotos	eser	Passeriformes	Estrildidae	0	0	2	0	0	5	5	1	2	1	4	11.5	8.75	4.5	12	1320000	12	10.2	6	12	0	0
Estrilda	perreini	espe	Passeriformes	Estrildidae	0	0	2	0	0	5	2	0	2	0	2	10.75	7.55	3.5	12	1040000	11	9	5	12	0	0
Estrilda	rhodopyga	esrh	Passeriformes	Estrildidae	0	0	2	0	0	5	5	0	0	0	2	10.75	8.05	4	13	1230000	10.5	9.5	4	12	0	0
Estrilda	thomensis	esth	Passeriformes	Estrildidae	0	0	2	0	0	5	1	0	.	0	0	11	7.65	3.5	13	87600	11	8.5	4	12	0	0
Granatina (Uraeginthus)	ianthinogaster	gria	Passeriformes	Estrildidae	0	0	2	0	0	5	2	0	1	1	0	13.5	14.7	4	13.5	1450000	14	17.4	5	13	0	0
Lagonosticta	rhodopareia	larh	Passeriformes	Estrildidae	0	0	2	0	0	5	5	0	0	1	3	10.5	10.25	4	12.5	2610000	11	13	5	12	0	0
Lonchura	ferruginosa	lofe	Passeriformes	Estrildidae	0	0	1	0	0	2	5	0	0	0	0	11.5	10	5.5	13.5	136000	12	10	7	13	0	1
Mandingoa	nitidula	mani	Passeriformes	Estrildidae	0	0	2	0	0	5	5	0	2	1	3	10.5	9.25	4.5	13	1540000	11	10	6	12	0	0
Neochmia	ruficauda	neru	Passeriformes	Estrildidae	0	0	2	0	0	5	2	0	2	1	2	11.5	11.15	4.5	13.5	1230000	11.5	13.8	6	12	0	0
Ortygospiza	atricollis	orat	Passeriformes	Estrildidae	0	0	2	0	0	5	5	0	0	1	11	9.5	10.7	5	14	3230000	10	12.4	6	14	0	0
Poephila	acuticauda	poac	Passeriformes	Estrildidae	0	0	2	0	0	5	3	1	2	0	2	15.5	14.05	4.5	13.5	845000	11	17.2	6	13	0	0
Poephila	cincta	pocinc	Passeriformes	Estrildidae	0	0	2	1	0	5	5	1	2	0	2	11	15	5	13	496000	11	17.1	6	12	0	0
Poephila	personata	pope	Passeriformes	Estrildidae	0	0	2	1	0	5	3	1	2	0	2	13	13.75	5	14	973000	13	17	6	13	0	0
Pytilia	melba	pyme	Passeriformes	Estrildidae	0	0	2	0	0	5	5	1	2	1	8	13	15.6	4	12.5	6030000	14	18.4	5	12	0	0
Uraeginthus	angolensis	uran	Passeriformes	Estrildidae	0	0	2	0	0	5	5	1	2	1	3	12.5	9.65	4	13.5	3460000	13	13	5	13	1	0
Carduelis	sinica	casi	Passeriformes	Fringillidae	0	0	2	0	2	5	6	3	2	1	6	13.25	19.5	4	13.5	5960000	14	22	5	12	2	0
Mycerobas	affinis	myaf	Passeriformes	Fringillidae	0	0	2	0	2	5	3	1	.	1	0	23	70.5	.	.	1010000	24	72		.	0	0
Serinus	canicollis	secai	Passeriformes	Fringillidae	0	0	2	0	0	5	5	2	2	1	3	12.75	14.85	3.5	13	616000	14	19.7	5	12	1	0
Serinus	citrinipectus	seci	Passeriformes	Fringillidae	0	0	2	0	0	5	5	2	2	1	0	12	11.15	3.5	13	49800	12	12.7	4	12	0	0
Serinus	leucopygius	sele	Passeriformes	Fringillidae	0	0	1	0	0	2	5	1	2	0	3	10.75	12	3	12	3040000	11.5	16	4	12	1	0
Irena	puella	irpu	Passeriformes	Irenidae	0	0	2	0	2	5	1	0	2	1	6	23.5	61.6	2	14	3720000	25.8	75.7	2	14	0	0
Musophaga	violacea	muvi	Psittaciformes	Musophagidae	0	0	1	0	0	3	6	0	2	0	0	50	360	2	25.5	2080000	50	360	2	25	0	0
Tauraco	corythaix	taco	Psittaciformes	Musophagidae	0	0	1	0	0	3	1	0	2	0	2	46	365	2.5	24.5	125000	47	380	3	23	0	0
Aethopyga	christinae	aech	Passeriformes	Nectariniidae	0	0	2	0	2	5	5	3	2	1	3	8.5	5.4	3	.	1760000	10	5.9	4	.	0	0
Aethopyga	temminckii	aete	Passeriformes	Nectariniidae	0	0	2	0	0	4	1	.	2	1	0	10	5	3	.	.	13	6.1	3	.	0	0
Anthodiaeta	collaris	anco	Passeriformes	Nectariniidae	0	0	2	0	0	5	6	0	2	1	9	10.25	7.55	2.5	13	9200000	10.5	11	4	12	0	0
Cinnyris	talatala	cita	Passeriformes	Nectariniidae	0	0	2	0	0	5	5	3	2	1	0	11	8.2	1.5	13.5	.	12	10	2	13	0	0
Callipepla	californica	caca	Galliformes	Odontophoridae	0	0	1	0	2	2	5	0	0	1	8	25	162	15	22.5	1090000	27	176	28	22	4	0
Callipepla	gambelii	cagam	Galliformes	Odontophoridae	0	0	2	0	0	5	5	0	1	1	7	25	156	23	23	544000	27	161	19	23	0	0
Colinus	virginianus	covi	Galliformes	Odontophoridae	0	0	2	0	2	5	5	0	0	1	22	22.5	129	13.45	23	4230000	25	173	15	23	9	0
Oriolus	cruentus	orcr	Passeriformes	Oriolidae	0	0	2	0	0	5	2	0	2	1	4	22.5	69.5	.	.	313000	24	71	.	.	0	1
Parus	major	pama	Passeriformes	Paridae	0	0	2	1	2	5	6	3	2	1	34	13.25	17	8.5	13.5	32600000	14	22.1	12	12	0	1
Bambusicola	fytchii	bafy	Galliformes	Phasianidae	0	0	2	0	1	5	3	0	0	0	2	35	328	5	18.5	530000	35	400	7	18	0	1
Chrysolophus	pictus	chpi	Galliformes	Phasianidae	0	0	2	0	1	5	2	3	0	1	0	65.5	625	8.5	22	970000	115	875	12	22	1	0
Coturnix	coturnix	cocotu	Galliformes	Phasianidae	0	0	2	0	2	5	5	2	0	1	4	17	112.5	8.5	18.5	16200000	18	155	13	17	2	1
Lophura	nycthemera	lony	Galliformes	Phasianidae	0	0	2	0	2	5	1	.	.	1	15	70.5	1225	7.5	25.5	988000	125	2000	15	25	0	1
Pavo	muticus	pamu	Galliformes	Phasianidae	0	0	2	0	2	5	3	0	0	1	3	105	male5000	4.5	27	1110000	250	5000	6	26	0	0
Syrmaticus	reevesii	syre	Galliformes	Phasianidae	0	0	2	0	0	5	1	0	1	1	0	75	1239	7.5	24.5	532000	210	1529	9	24	0	1
Agapornis	canus	agca	Psittaciformes	Psittacidae	0	0	1	0	0	3	5	0	2	1	2	15	28	4.5	23	413000	15	31	6	23	2	0
Alisterus	scapularis	alsc	Psittaciformes	Psittacidae	0	0	1	1	0	3	6	1	2	1	2	42.5	242	4.5	20	811000	43	275	6	20	0	0
Amazona	aestiva	amae	Psittaciformes	Psittacidae	0	0	1	1	0	3	1	3	2	0	2	37	400	3	24.5	4220000	37	400	5	23	0	0
Amazona	albifrons	amal	Psittaciformes	Psittacidae	0	0	1	1	0	3	2	1	2	1	3	27	209	4	24	544000	29	242	5	24	0	0
Amazona	amazonica	amamaz	Psittaciformes	Psittacidae	0	0	1	1	0	3	5	.	2	0	0	31	383.5	3.5	21	7420000	31	469	5	21	1	0
Amazona	autumnalis	amau	Psittaciformes	Psittacidae	0	0	1	1	1	3	1	0	2	0	4	33.5	349.5	3.5	25.5	876000	35	485	4	25	0	0
Amazona	barbadensis	amba	Psittaciformes	Psittacidae	0	0	1	1	0	3	3	3	2	0	0	33	270	3.5	24.5	11000	33	270	5	22	0	0
Amazona	finschi	amfi	Psittaciformes	Psittacidae	0	0	1	1	2	3	1	3	2	0	0	32.5	297	2	28.5	111000	34	312	2	28	0	0
Amazona	ochrocephala	amoc	Psittaciformes	Psittacidae	0	0	1	1	2	3	5	0	2	0	10	36.5	437.5	2.5	25.5	6630000	38	535	3	25	0	0
Amazona	tucumana	amtu	Psittaciformes	Psittacidae	0	0	1	1	0	3	1	0	2	0	0	31	265	4	26.5	69200	31	280	4	26	0	0
Amazona	vinacea	amvi	Psittaciformes	Psittacidae	0	0	1	1	0	3	1	3	2	0	0	30	254	3	25.5	106000	30	282	4	25	0	0
Amazona	xanthops	amxa	Psittaciformes	Psittacidae	0	0	1	1	0	3	3	3	2	0	0	27	.	.	23.5	1900000	27	.	.	23	0	0
Aprosmictus	erythropterus	aper	Psittaciformes	Psittacidae	0	0	2	1	0	5	4	3	2	0	2	31	156	5	21	2570000	32	156	6	20	0	0
Aratinga (Psittacara)	acuticaudata	arac	Psittaciformes	Psittacidae	0	0	1	1	0	3	3	3	2	0	5	35.5	173	2	23	3330000	38	176	5	23	0	0
Ara	ararauna	arar	Psittaciformes	Psittacidae	0	0	1	1	0	2	1	0	2	0	0	86	1187.5	2	.	7730000	86	1380	3	.	1	0
Aratinga (Eupsittula)	aurea	araure	Psittaciformes	Psittacidae	0	0	2	0	0	5	6	1	2	0	0	25.5	76.5	3	23	5730000	28	94	4	23	0	0
Aratinga	auricapilla	arauri	Psittaciformes	Psittacidae	0	0	1	0	0	3	5	.	.	0	2	30	130	.	.	67100	30	130	.	.	0	0
Aratinga (Eupsittula)	canicularis	arca	Psittaciformes	Psittacidae	0	0	1	1	2	3	5	0	2	0	3	24	74	4	30	270000	25	80	5	30	0	0
Ara	chloroptera	arch	Psittaciformes	Psittacidae	0	0	1	1	0	3	1	.	2	0	0	92.5	1379	2.5	.	8100000	95	1708	3	.	1	0
Aratinga (Psittacara)	erythrogenys	arer	Psittaciformes	Psittacidae	0	0	1	1	0	3	6	3	2	0	0	33	174	3	23	106000	33	184	4	23	4	0
Aratinga (Psittacara)	finschi	arfi	Psittaciformes	Psittacidae	0	0	2	1	0	5	1	2	2	0	0	28	150	3	.	115000	28	150	4	.	0	0
Aratinga	holochlora	arho	Psittaciformes	Psittacidae	0	0	2	1	2	5	3	1	2	0	3	32	232	4	23	275000	32	232	4	23	0	0
Aratinga	jandaya	arja	Psittaciformes	Psittacidae	0	0	1	1	0	3	5	.	2	0	0	30	89.4	3	26	1510000	30	91	3	26	0	0
Aratinga (Psittacara)	leucophthalmus	arle	Psittaciformes	Psittacidae	0	0	2	1	0	5	4	0	2	0	3	33.5	159	3.5	28	8510000	35	218	4	28	0	0
Aratinga (Psittacara)	mitrata	armi	Psittaciformes	Psittacidae	0	0	1	1	0	3	3	0	2	0	2	34.5	247	2.5	.	251000	38	275	3	.	0	0
Aratinga (Eupsittula)	nana	arna	Psittaciformes	Psittacidae	0	0	1	1	2	3	3	2	2	0	3	24	78.5	4	.	11000	26	85	5	.	0	0
Aratinga (Eupsittula)	pertinax	arpe	Psittaciformes	Psittacidae	0	0	1	1	0	2	5	3	2	0	14	25	89	4.5	23	1660000	25	102	7	23	9	0
Ara	severa	arse	Psittaciformes	Psittacidae	0	0	1	0	0	3	4	1	2	0	0	48.5	336	2	28	5770000	51	387	2	28	1	0
Aratinga	solstitialis	arso	Psittaciformes	Psittacidae	0	0	1	0	0	3	2	.	2	0	0	30	125	4	28	96400	30	135	4	28	0	0
Aratinga (Psittacara)	wagleri	arwa	Psittaciformes	Psittacidae	0	0	.	1	0	.	5	3	3	0	4	36	189.5	.	.	203000	36	217	.	.	0	0
Barnardius	zonarius	bazo	Psittaciformes	Psittacidae	0	0	1	1	0	4	5	0	2	0	3	38	160.5	5.5	19	5310000	38	200	7	19	0	0
Bolborhynchus	lineola	boli	Psittaciformes	Psittacidae	0	0	1	1	0	3	5	0	2	0	2	17	50.5	.	18	250000	18	59	.	18	0	0
Chalcopsitta	atra	chat	Psittaciformes	Psittacidae	0	0	1	0	0	4	4	.	.	0	3	32	260	2	25	77300	32	260	2	25	0	0
Chalcopsitta	cardinalis	chca	Psittaciformes	Psittacidae	0	0	1	1	0	3	5	1	2	0	0	30.5	194	.	.	37500	31	215	.	.	0	0
Coracopsis	nigra	coni	Psittaciformes	Psittacidae	0	0	1	1	0	3	4	0	2	0	3	37.5	142.5	2.5	18	591000	40	315	3	18	0	0
Coracopsis	vasa	cova	Psittaciformes	Psittacidae	0	0	1	0	0	3	5	1	2	0	3	50	525	3	17	413000	50	560	3	17	0	0
Cyanoramphus	auriceps	cyau	Psittaciformes	Psittacidae	0	0	2	1	0	5	1	0	2	0	0	23	46	7	.	64800	23	58.5	9	.	0	0
Cyanoramphus	novaezelandiae	cyno	Psittaciformes	Psittacidae	0	0	1	1	0	3	1	1	2	0	6	27	81.5	7	20	19900	27	113	9	20	0	0
Cyanoliseus	patagonus	cypa	Psittaciformes	Psittacidae	0	0	1	1	0	3	5	1	2	0	4	45.5	279.5	3	24.5	975000	52	303	4	24	0	0
Diopsittaca	nobilis	dino	Psittaciformes	Psittacidae	0	0	1	1	0	3	5	1	2	0	3	30	149	4	24	495000	30	169	4	24	0	0
Eos	reticulata	eore	Psittaciformes	Psittacidae	0	0	1	.	0	3	4	.	.	0	0	31	150	2	.	4400	31	155	2	.	0	0
Eos	squamata	eosq	Psittaciformes	Psittacidae	0	0	1	1	0	4	5	1	.	0	3	27	110	2	27	34100	27	110	2	27	0	0
Forpus	coelestis	foco	Psittaciformes	Psittacidae	0	0	1	1	0	3	3	.	2	0	0	13	26	5	17	147000	13	28	6	17	0	0
Guarouba	guarouba	gugu	Psittaciformes	Psittacidae	0	0	1	1	0	3	3	1	2	0	0	35	194	2.5	30	246000	36	196	3	30	0	0
Lorius	chlorocercus	loch	Psittaciformes	Psittacidae	0	0	2	.	0	5	5	.	.	0	0	28	189	.	.	14000	28	225	.	.	0	0
Lorius	lory	lolo	Psittaciformes	Psittacidae	0	0	2	0	0	5	1	0	2	0	7	31	211.5	2	24	676000	33	260	2	24	0	0
Myiopsitta	monachus	mymo	Psittaciformes	Psittacidae	0	0	2	0	0	5	5	0	2	0	3	28.5	115	6	24	2720000	29	140	11	24	15	0
Neopsephotus	bourkii	nebo	Psittaciformes	Psittacidae	0	0	1	1	0	2	3	3	2	0	0	19	39	4.5	18	1720000	19	39	6	18	0	0
Neophema	splendida	nesp	Psittaciformes	Psittacidae	0	0	1	1	0	2	3	3	2	0	0	19	40	4	18	262000	19	44	5	18	0	0
Orthopsittaca	manilata	orma	Psittaciformes	Psittacidae	0	0	1	1	0	3	4	3	2	0	0	50.5	341	2	25	7150000	51	390	2	25	0	0
Pionus	chalcopterus	pich	Psittaciformes	Psittacidae	0	0	1	1	0	3	1	2	2	0	0	28.5	210	2	26	177000	29	210	2	26	0	0
Pionus	fuscus	pifu	Psittaciformes	Psittacidae	0	0	1	1	0	2	1	0	2	0	0	25.5	204	4	.	1870000	26	229	4	.	0	0
Pionus	maximiliani	pima	Psittaciformes	Psittacidae	0	0	1	1	0	3	3	0	2	0	4	27	263	4.5	.	4520000	29	293	5	.	0	0
Pionites	melanocephala	pimel	Psittaciformes	Psittacidae	0	0	1	1	0	3	1	3	2	0	2	23	151.5	2	.	2920000	23	170	2	.	0	0
Pionus	menstruus	pimen	Psittaciformes	Psittacidae	0	0	1	1	0	3	5	1	2	0	3	26	252	4	26.5	8370000	28	295	4	24	0	0
Pionus	senilis	pise	Psittaciformes	Psittacidae	0	0	1	1	1	3	5	3	2	0	0	24	211	4.5	27	459000	24	229	6	26	0	0
Platycercus	adelaidae	plade	Psittaciformes	Psittacidae	0	0	1	1	0	3	6	1	2	0	2	36	132.5	4.5	19	.	36	165	5	19	0	0
Platycercus	adscitus	plads	Psittaciformes	Psittacidae	0	0	1	1	0	3	5	1	2	0	2	30	137.5	4	19	1470000	30	175	5	19	0	0
Platycercus	caledonicus	plca	Psittaciformes	Psittacidae	0	0	1	1	0	3	1	0	2	0	0	36	127.5	5	19	68100	36	165	6	19	0	0
Platycercus	eximius	plex	Psittaciformes	Psittacidae	0	0	2	1	0	5	6	0	3	0	3	30	105	6.5	19	1080000	30	120	9	19	1	0
Platycercus	flaveolus	plfl	Psittaciformes	Psittacidae	0	0	1	0	0	2	5	1	2	0	0	33.5	120	4.5	19	842000	34	135	5	19	0	0
Platycercus	icterotis	plic	Psittaciformes	Psittacidae	0	0	1	1	0	3	5	0	2	0	2	25.5	66	5	19	214000	26	80	7	19	0	0
Polytelis	alexandrae	poal	Psittaciformes	Psittacidae	0	0	1	1	0	2	3	3	2	0	0	45	104	5	21	1230000	45	120	6	21	0	0
Poicephalus	cryptoxanthus	pocr	Psittaciformes	Psittacidae	0	0	1	1	0	3	5	1	2	0	2	24	138.5	2.5	28	1180000	25	156	3	28	0	0
Poicephalus	gulielmi	pogu	Psittaciformes	Psittacidae	0	0	2	1	0	5	1	0	2	0	3	28	277.5	3	27	1460000	30	3000	4	26	0	0
Poicephalus	meyeri	pome	Psittaciformes	Psittacidae	0	0	2	1	0	5	3	0	2	0	6	23	125	3	30	5840000	25	150	4	29	0	0
Poicephalus	robustus	poro	Psittaciformes	Psittacidae	0	0	1	1	0	4	1	0	2	1	3	33	313	4	27	3040000	36	401	4	26	0	0
Poicephalus	rueppellii	porue	Psittaciformes	Psittacidae	0	0	2	0	0	5	4	0	2	1	0	23.5	119	4	.	598000	25	140	5	.	0	0
Poicephalus	rufiventris	poruf	Psittaciformes	Psittacidae	0	0	1	.	0	3	2	0	.	1	2	25	120	.	.	1540000	25	120	.	.	0	0
Poicephalus	senegalus	posen	Psittaciformes	Psittacidae	0	0	1	1	0	3	6	0	2	1	2	23	140.5	3	25	2710000	23	161	4	25	0	0
Polytelis	swainsonii	posw	Psittaciformes	Psittacidae	0	0	1	1	0	3	4	1	2	0	0	40	145	5	20	81200	40	157	6	20	0	0
Propyrrhura	auricollis	prau	Psittaciformes	Psittacidae	0	0	1	1	0	3	1	1	2	0	0	41	245	3.5	23	838000	45	250	4	23	0	0
Psittacula	alexandri	psal	Psittaciformes	Psittacidae	0	0	1	1	2	4	6	1	2	1	8	35.5	150.5	3.5	28	2570000	38	168	4	28	2	0
Psittacula	cyanocephala	pscyano	Psittaciformes	Psittacidae	0	0	1	1	2	4	5	0	2	1	0	35	70.5	4.5	24	2780000	37	85	5	24	0	0
Psittinus	cyanurus	pscyanu	Psittaciformes	Psittacidae	0	0	1	1	0	3	5	2	2	1	3	18	87.5	3	.	1400000	20	90	3	.	0	0
Psittacula	derbiana	psde	Psittaciformes	Psittacidae	0	0	1	1	1	3	5	1	2	0	0	48	251	.	.	333000	50	251	.	.	0	0
Psittacus	erithacus	pser	Psittaciformes	Psittacidae	0	0	1	1	0	3	4	0	2	0	2	33.5	446	2.5	25.5	2760000	29	490	3	21	2	0
Psittacula	eupatria	pseu	Psittaciformes	Psittacidae	0	0	1	1	2	4	5	0	2	0	5	56	228	3.5	20	3220000	62	258	4	19	4	0
Pseudeos	fuscata	psfu	Psittaciformes	Psittacidae	0	0	1	1	0	4	6	3	2	0	0	25	154.5	2	24	766000	25	192	2	24	0	0
Psitteuteles	goldiei	psgo	Psittaciformes	Psittacidae	0	0	2	0	0	5	1	3	2	0	0	19	58.5	2	23	307000	19	61	2	23	0	0
Psephotus	haematonotus	psha	Psittaciformes	Psittacidae	0	0	1	1	0	3	6	0	2	1	2	27	62	5	19	1490000	27	70	8	19	0	0
Psephotus	varius	psva	Psittaciformes	Psittacidae	0	0	2	1	0	5	3	0	2	1	0	27.5	61.5	5	19	3330000	28	70	7	19	0	0
Pyrrhura	egregia	pyeg	Psittaciformes	Psittacidae	0	0	.	.	0	.	1	.	.	0	2	25	66.3	.	.	49400	25	66.6	.	.	0	0
Pyrrhura	frontalis	pyfr	Psittaciformes	Psittacidae	0	0	1	1	0	3	1	.	2	0	2	26	83	5	30	1700000	28	94	5	30	0	0
Pyrrhura	lepida	pyle	Psittaciformes	Psittacidae	0	0	1	.	0	1	1	.	.	0	3	24	75	.	.	548000	24	80	.	.	0	0
Pyrrhura	molinae	pymo	Psittaciformes	Psittacidae	0	0	.	1	0	.	1	1	2	0	5	26	71.5	3	23	675000	26	81	3	22	0	0
Pyrrhura	picta	pypi	Psittaciformes	Psittacidae	0	0	1	1	0	3	1	.	2	0	9	22	65.5	4.5	.	1470000	22	85	5	.	0	0
Pyrrhura	rhodocephala	pyrh	Psittaciformes	Psittacidae	0	0	.	.	0	.	1	0	.	0	0	24.5	80	.	.	7200	25	85	.	.	0	0
Pyrrhura	rupicola	pyru	Psittaciformes	Psittacidae	0	0	.	.	0	.	1	.	.	0	2	25	75	7	.	546000	25	75	7	.	0	0
Tanygnathus	megalorynchos	tame	Psittaciformes	Psittacidae	0	0	1	1	0	3	5	1	2	0	5	38	325	.	.	97200	43	325	.	.	0	0
Trichoglossus	chlorolepidotus	trch	Psittaciformes	Psittacidae	0	0	1	1	0	4	6	3	2	0	0	23	79.5	2.5	25	1150000	23	89	3	25	0	0
Trichoglossus	euteles	treu	Psittaciformes	Psittacidae	0	0	1	1	0	1	2	1	.	0	0	25	73.7	3	23	38100	25	73.7	3	23	0	0
Trichoglossus	flavoviridis	trfl	Psittaciformes	Psittacidae	0	0	1	1	0	1	6	.	2	0	2	21	87.5	2	23	4100	21	95	2	23	0	0
Trichoglossus	haematodus	trhr	Psittaciformes	Psittacidae	0	0	1	1	0	4	5	1	2	0	20	27.5	116	2	25	875000	30	157	3	25	2	0
Trichoglossus	ornatus	tror	Psittaciformes	Psittacidae	0	0	1	1	0	2	5	.	.	0	0	25	120	2	27	173000	25	130	2	27	0	0
Vini	australis	viau	Psittaciformes	Psittacidae	0	0	1	1	0	4	6	1	2	0	0	19	49.5	1.5	23	3700	19	52	2	23	0	0
Hemixos	flavala	hefl	Passeriformes	Pycnonotidae	0	0	2	0	2	5	5	0	1	0	5	20.5	32.5	3	13.5	1100000	21	35.2	3	13	0	0
Rhipidura	albicollis	rhal	Passeriformes	Rhipiduridae	0	0	3	0	2	5	6	0	0	0	9	19	11.5	3	12.5	5410000	20.5	13	4	12	0	0
Mino	dumontii	midu	Passeriformes	Sturnidae	0	0	2	1	0	5	2	0	2	0	0	25	217	1.5	14	701000	25	217	2	14	0	0
Scissirostrum	dubium	scdu	Passeriformes	Sturnidae	0	0	2	0	0	5	1	1	3	0	0	20	50	2	13.5	144000	20	50	2	13	0	0
Speculipastor	bicolor	spbi	Passeriformes	Sturnidae	0	0	2	1	0	5	2	1	2	1	0	19	69	4	18	1310000	19	69	6	18	0	0
Sturnia (Sturnus)	erythropygia (erythropygius)	ster	Passeriformes	Sturnidae	0	0	2	1	0	5	5	0	2	0	3	20	.	4	.	5500	20	.	4	.	0	0
Gampsorhynchus	rufulus	garu	Passeriformes	Timaliidae	0	0	3	0	2	5	3	0	1	0	0	23.5	43	3.5	.	454000	24	49	4	.	0	0
Malacias (Heterophasia)	gracilis	magr	Passeriformes	Timaliidae	0	0	2	0	2	5	3	0	2	0	0	23.5	38	3	.	240000	24.5	42	4	.	0	0
Panurus	biarmicus	pabi	Passeriformes	Timaliidae	0	0	2	0	0	5	4	3	1	1	3	15.75	15.9	7	12	10800000	17	20.8	11	10	0	0
Rhinocichla (Garrulax)	mitrata (mitratus)	rhmi	Passeriformes	Timaliidae	0	0	2	0	0	5	5	0	2	0	2	23	.	2	.	432000	24	.	2	.	0	0
Stachyris	thoracica	stth	Passeriformes	Timaliidae	0	0	3	0	0	5	1	0	0	0	2	18	.	2.5	.	63800	18	.	3	.	0	0
Trochalopteron (Garrulax)	formosum (formosus)	trfo	Passeriformes	Timaliidae	0	0	2	0	2	5	3	0	.	0	2	27.5	94.5	.	.	141000	28	106	.	.	0	0
Erithacus	rubecula	erru	Passeriformes	Turdidae	0	0	2	1	1	6	5	3	2	0	8	14	19.5	5.5	16.5	10200000	14	25	7	12	0	0
Luscinia	megarhynchos	lume	Passeriformes	Turdidae	0	0	2	0	0	5	5	3	0	0	3	16.5	27.5	4.5	13.5	7590000	17	39	5	13	0	1
Luscinia	svecica	lusv	Passeriformes	Turdidae	0	0	2	0	2	5	4	3	0	1	10	14	18.5	5.5	13	12900000	15	25	7	13	0	1
Monticola	solitarius	moso	Passeriformes	Turdidae	0	0	2	1	2	6	6	2	3	1	5	21.5	53.5	4.5	13.5	9790000	23	70	6	12	0	1
Myophonus	caeruleus	myca	Passeriformes	Turdidae	0	0	2	0	2	5	5	0	2	0	6	32	183.5	3.5	.	5870000	35	231	5	.	0	1
Saxicola	caprata	saca	Passeriformes	Turdidae	0	0	2	0	2	5	5	3	0	1	16	13.5	20	4	13.5	9770000	14	26	5	13	0	0
Turdus	merula	tume	Passeriformes	Turdidae	0	0	2	0	2	6	6	3	3	1	9	25.5	104.5	4	14.5	13900000	27	149	6	10	2	1
Turdus	naumanni	tuna	Passeriformes	Turdidae	0	0	2	.	2	5	6	3	2	1	0	24	72	.	.	4830000	25	81	.	.	0	1
Zoothera	citrina	zocii	Passeriformes	Turdidae	0	0	2	0	2	5	6	3	2	1	11	21.5	57	3.5	13.5	2780000	23	67	4	13	0	0
Zoothera	interpres	zoin	Passeriformes	Turdidae	0	0	2	0	0	5	1	0	2	0	0	17	.	2.5	.	675000	18	.	3	.	0	0
Vidua	regia	vire	Passeriformes	Viduidae	0	0	1	0	0	2	3	0	2	1	0	10.5	14.5	3.5	12.5	1920000	30	17	4	12	0	0
Zosterops	atricapilla	zoat	Passeriformes	Zosteropidae	0	0	2	0	0	5	2	.	2	0	2	9.75	9.75	.	.	116000	10	11	.	.	0	1
Zosterops	erythropleurus	zoer	Passeriformes	Zosteropidae	0	0	3	0	2	5	2	3	2	1	0	11	11.5	5.5	.	988000	11.5	13	6	.	0	1
Zosterops	pallidus	zopall	Passeriformes	Zosteropidae	0	0	2	0	0	5	5	3	2	0	6	11.5	14	2.5	11.25	1310000	13	20	3	10.5	0	1
Zosterops	palpebrosus	zopalp	Passeriformes	Zosteropidae	0	0	2	0	2	5	5	3	2	0	11	10.3	8.3	3	10.5	6780000	11	11	4	10	1	1
Zosterops	poliogastrus	zopo	Passeriformes	Zosteropidae	0	0	2	0	0	5	5	0	2	0	8	11.75	11.5	2.5	.	249000	12	14	3	.	0	1
Zosterops	senegalensis	zpse	Passeriformes	Zosteropidae	0	0	2	0	0	5	6	0	2	0	14	11.5	10.45	2.5	11	8340000	11.5	14.1	4	11	0	1

## Sheet: Table S2-code description
code	diet	code	habitat	code	migration pattern	code	latitude overlap with Taiwan	code	Nesting location	code	sexual dicromatism	code	Hole nest	code	Feeding	code	Taiwan genus_resident (not including residents of Kinmen island)
0		0	others (tundra, sea cliffs)	0	sedentary	0	no overlap with Taiwan	0	ground	0	F and M: same color forms	0	no			0	no
1	grasses/herbs/vegetative material	1	mixed lowland forest & forest (woods)	1	local movement (including altudinal migrant)	1	partial overlap with Taiwan	1	shrub & bush	1	F and M: different color forms	1	yes	1	Herbivore	1	yes
2	seeds/grains	2	shrub & bush	2	partial migration	2	completely cover Taiwan	2	subcanopy & canopy & tree					2	Ominvore
3	fruits/berries	3	grassland & prairie	3	migrant			3	building					3	Carnivore
4	pollen/nectar	4	marsh & wetland & swamp
5	invertebrate prey/insect/beetle	5	cultivated & farmland & orchard & garden
6	vertebrate prey/carrion	6	urban & city
Note
