# Supplementary material for: Contrasting determinants for the introduction and establishment success of exotic birds in Taiwan using decision trees models
Source: PeerJ journal article supplement (doi:10.7717/peerj.3092), 2017-03-14
Supplement: supplementary_S4_(figure_S3-S6).pdf [file supplementary_S4_%28figure_S3-S6%29.pdf]

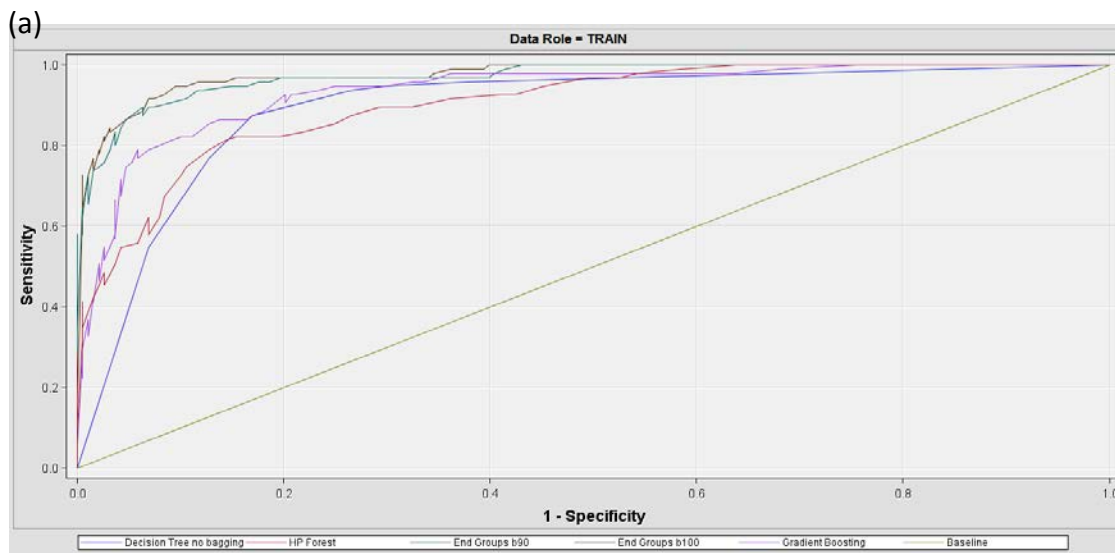

(b)

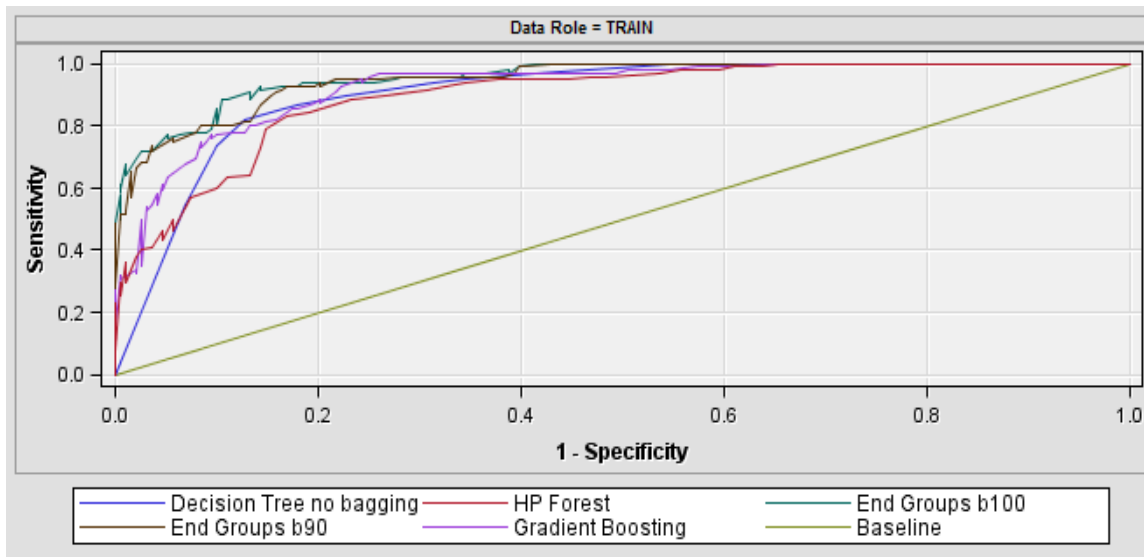

(c)

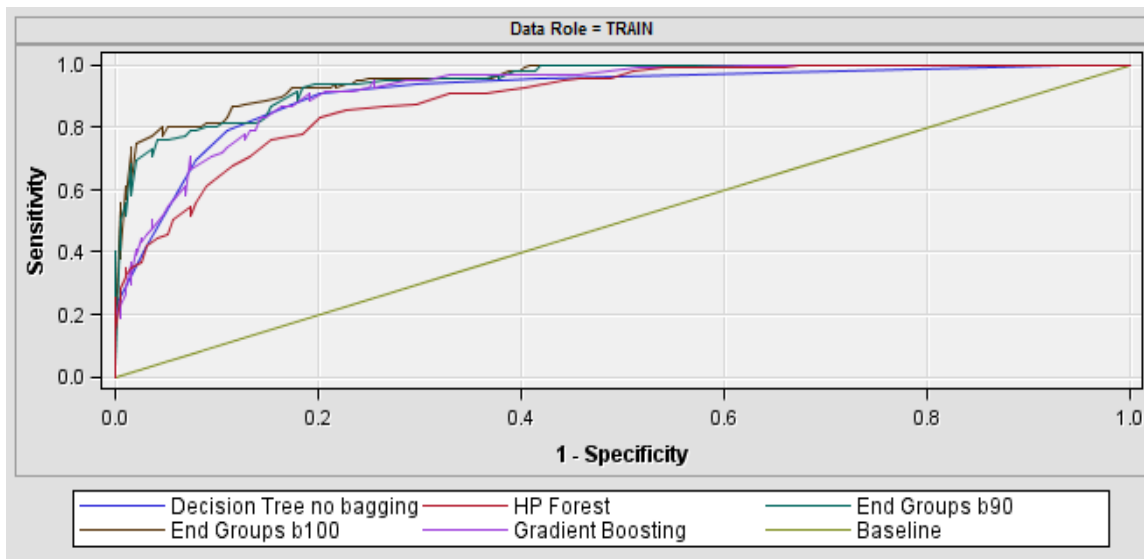

Figure S3. Receiver operating characteristic (ROC) curves of five introduction models: (a) variable treatment I, (b) variable treatment II, and (c) variable treatment III.

(a)

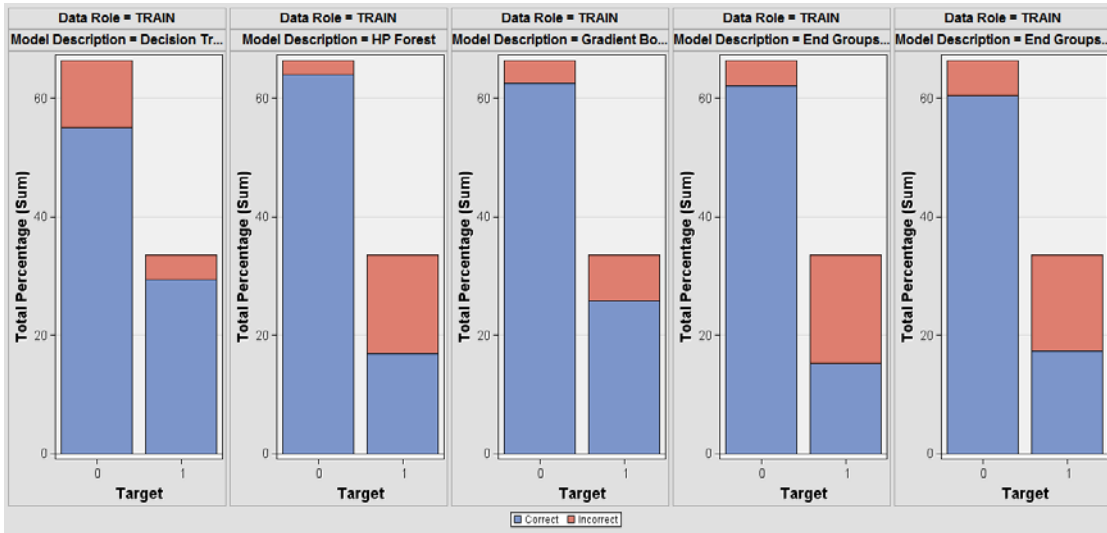

(b)

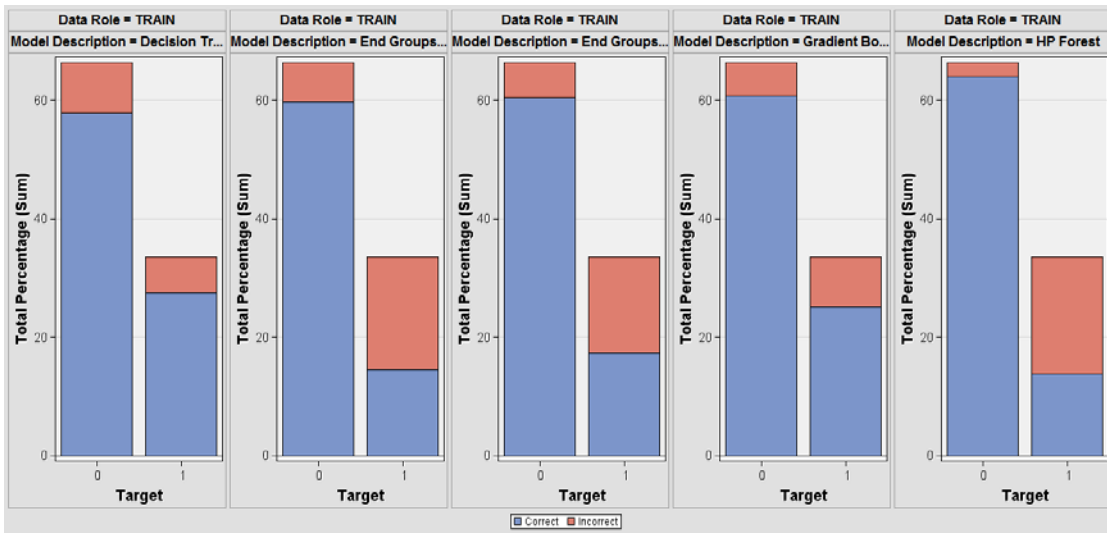

(c)

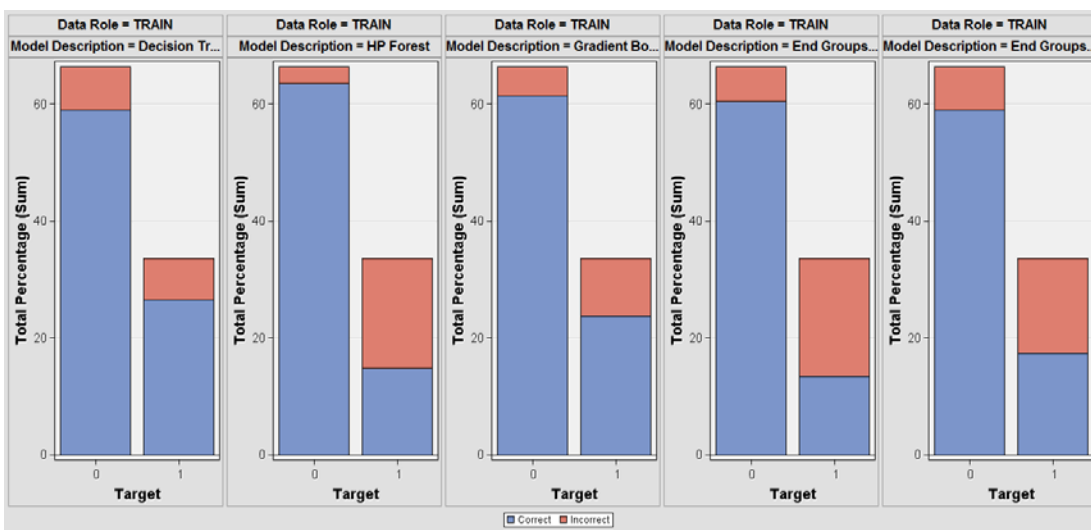

Figure S4. Classification charts of five introduction models: (a) variable treatment I, (b) variable treatment II, and (c) variable treatment III.

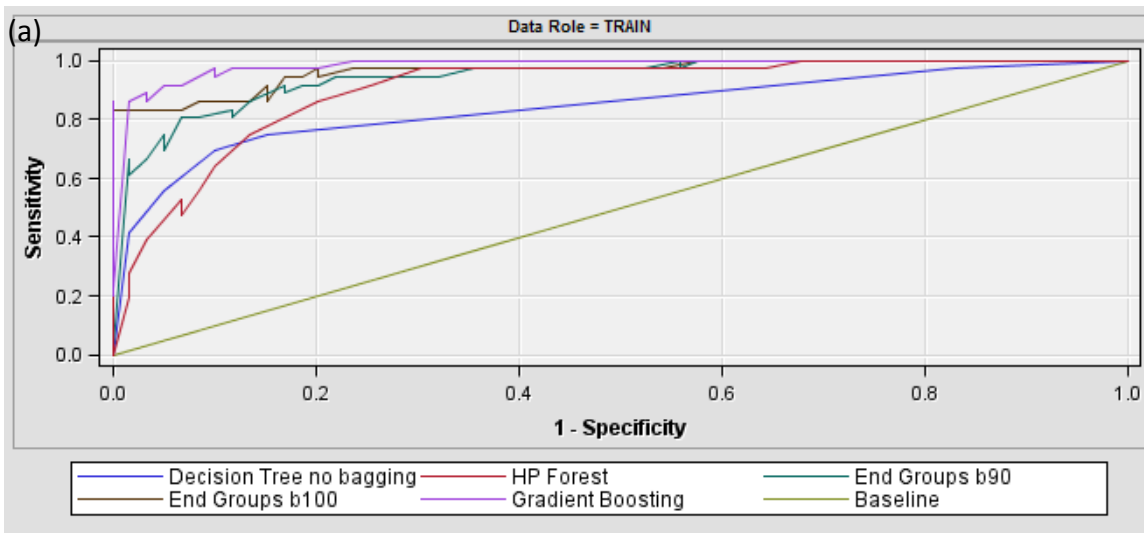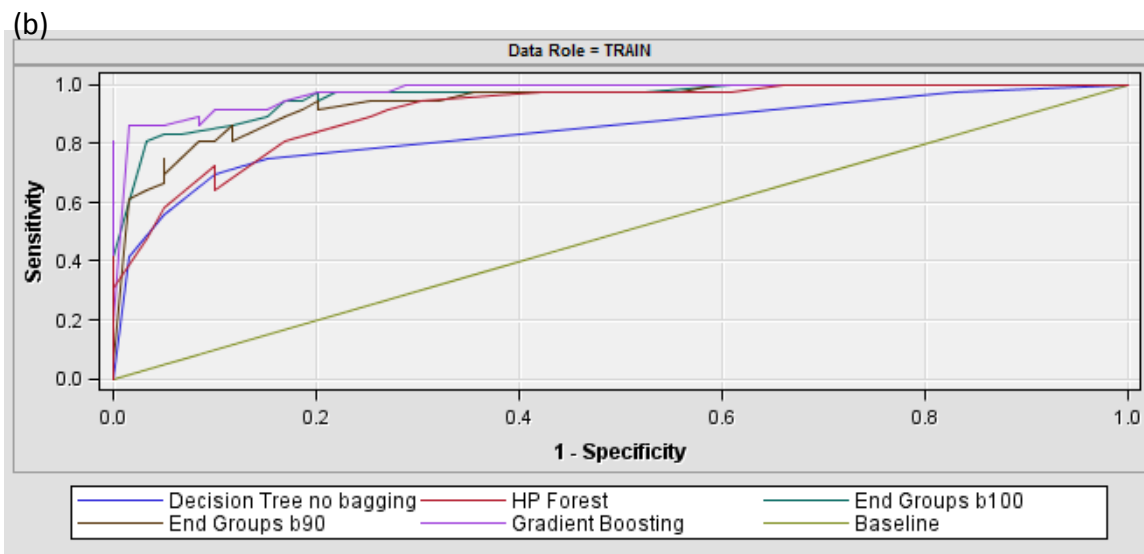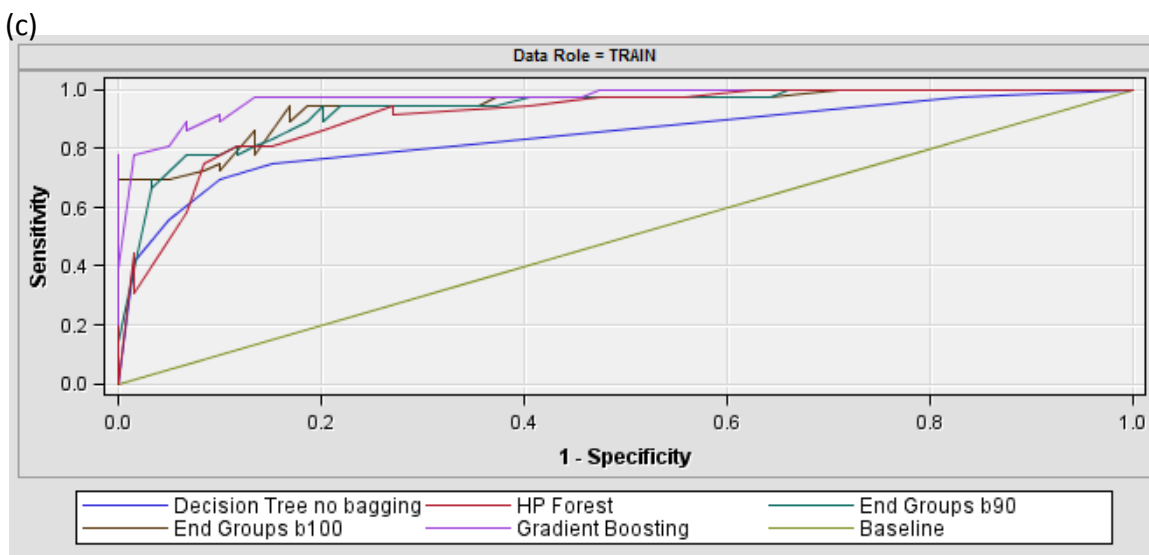

Figure S5. Receiver operating characteristic (ROC) curves of five establishment models: (a) variable treatment I, (b) variable treatment II, and (c) variable treatment III.

(a)

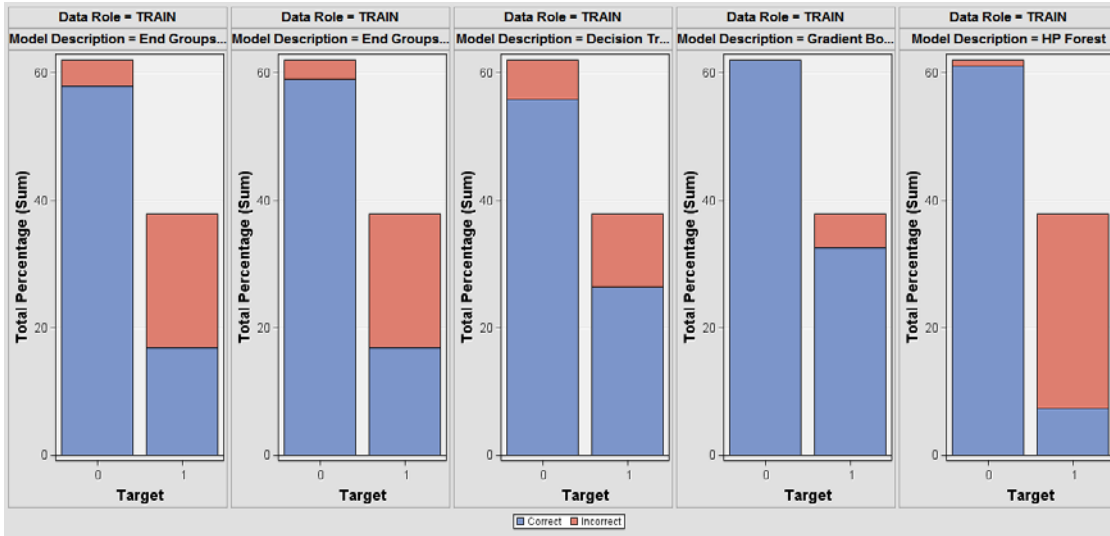

(b)

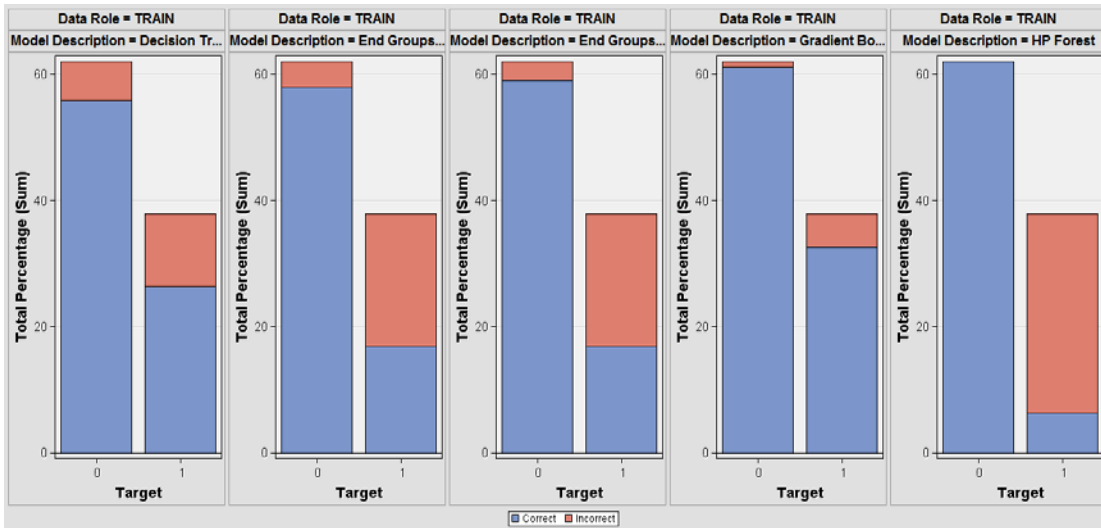

(c)

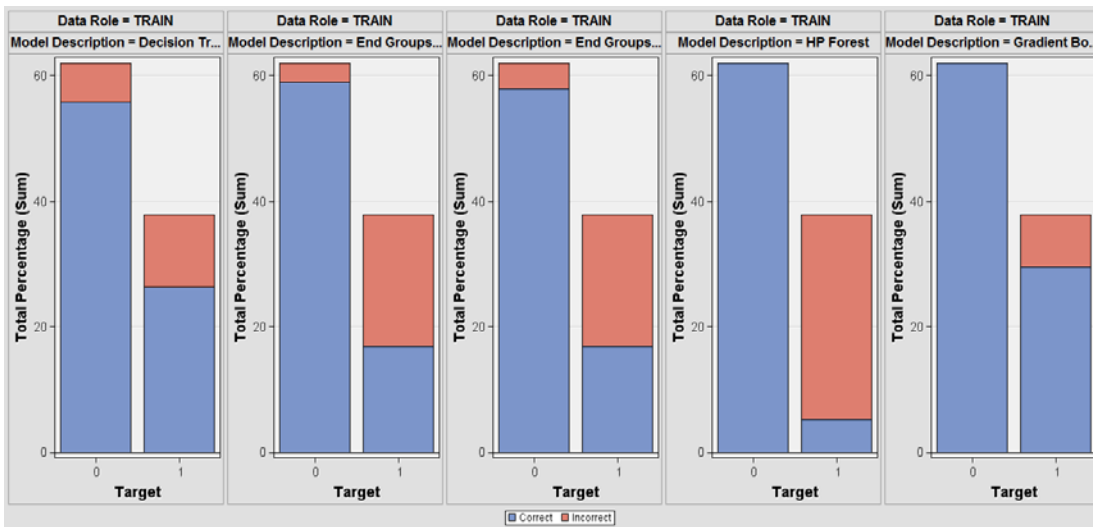

Figure S6. Classification charts of five establishment models: (a) variable treatment I, (b) variable treatment II, and (c) variable treatment III.
